# Supplementary material for: Cigarette smokers have exaggerated alveolar barrier disruption in response to lipopolysaccharide inhalation
Source: HighWire-hosted journal article supplement (doi:10.1136/thoraxjnl-2015-207886), 2016-02-02
Supplement: thoraxjnl-2015-207886supp.pdf [file thoraxjnl-2015-207886supp.pdf]

## **Cigarette smokers have exaggerated alveolar barrier disruption in response to lipopolysaccharide inhalation**

Farzad Moazed MD, Ellen L. Burnham MD, R. William Vandivier MD, Cecilia M. O’Kane PhD, Murali Shyamsundar PhD, Umar Hamid MD, Jason Abbott, David R. Thickett MD, Michael. A. Matthay MD, Daniel F. McAuley MD, Carolyn S. Calfee MD, MAS

Online Data Supplement:

### **Methods:**

The first cohort was comprised of healthy outpatients enrolled in an elective bronchoscopy study at the University of Colorado.<sup>1</sup> Subjects underwent bronchoscopy with BAL. The bronchoscope was wedged into a subsegment of either the right middle lobe or the lingula. Three to four 50 mL aliquots of 0.9% saline were then instilled and aspirated with low suction. The first aspirated aliquot was discarded, while the second and subsequent aliquots were combined and used in experiments as representative of the distal airspaces. BAL fluid was immediately centrifuged (900 g, 5 min) after collection to separate cellular and acellular components. Specimens were aliquoted and stored at -80°C.

The second cohort consisted of healthy non-alcoholic volunteers enrolled in a study at Queen’s University, Belfast, United Kingdom.<sup>2</sup> Subjects were randomized to either simvastatin or placebo for 4 days and then exposed to 50 µg inhaled LPS (*Escherichia coli* serotype O26:B6; Sigma Chemicals, Poole, Dorset, UK). LPS was dissolved in sterile 0.9% saline and inhaled via an automatic inhalation–synchronized dosimeter nebuliser (Spira, Hameenlinna, Finland). This technique delivers particles of a mass median aerodynamic

diameter (MMAD) of 10  $\mu\text{m}$  as described previously.<sup>3</sup> Each subject performed five successive inhalations of the LPS solution (1.25 mg/mL) through a mouthpiece with a nose clip in place, for a total inhaled dose of 50  $\mu\text{g}$ . The bronchoscope was wedged into a subsegment of the right middle lobe, followed by three 60 ml aliquots of 0.9% saline, which was aspirated immediately with low suction. BAL fluid was immediately placed on ice and transferred to the laboratory for processing. BAL fluid was centrifuged (900g, 5 minutes) and the supernatant was removed and stored at - 80°C for subsequent analysis.

**Table S1: Bronchoalveolar lavage biomarkers of lung injury and inflammation in unstimulated subjects and after LPS inhalation**

| Biomarker                             | Unstimulated – Colorado Cohort        |                                      |              | Post-LPS – Belfast Cohort               |                                     |              |
|---------------------------------------|---------------------------------------|--------------------------------------|--------------|-----------------------------------------|-------------------------------------|--------------|
|                                       | Nonsmokers<br>(n=10)<br>(Median, IQR) | Smokers<br>(n = 10)<br>(Median, IQR) | P-<br>value* | Nonsmokers<br>(n = 21)<br>(Median, IQR) | Smokers<br>(n = 9)<br>(Median, IQR) | P-<br>value* |
| Neutrophils (%)                       | 1 (0 – 2)                             | 1 (0 – 2)                            | 0.79         | 31 (24 – 48)                            | 42 (41 – 59)                        | 0.02         |
| Neutrophils (x 10 <sup>5</sup> cells) | 1 (1 – 2)                             | 4 (1 – 7)                            | 0.14         | 3 (2 – 8)                               | 9 (6 – 16)                          | 0.02         |
| Total Protein (µg/mL)                 | 72 (52 – 176)                         | 81 (38 – 101)                        | 0.41         | 208 (177 – 264)                         | 274 (246 – 326)                     | 0.04         |
| VEGF (pg/mL)                          | 294 (190 – 400)                       | 38 (20 – 61)                         | 0.001        | 219 (167 – 308)                         | 1 (1 – 7)                           | <0.0001      |
| sVEGFr-1 (pg/mL)                      | 0 (0 – 0)                             | 1 (0 – 13)                           | 0.08         | 31 (19 – 34)                            | 99 (84 – 129)                       | 0.0001       |
| IL-1β (pg/mL)                         | 0 (0 – 0)                             | 1 (0 – 1)                            | 0.007        | 37 (25 – 58)                            | 108 (52 – 136)                      | 0.002        |
| IL-8 (pg/mL)                          | n/a                                   | n/a                                  | n/a          | 349 (219 – 467)                         | 346 (287 – 415)                     | 0.57         |
| SP-D (ng/mL)                          | 413 (373 – 447)                       | 331 (203 – 477)                      | 0.82         | 1347 (675 – 3104)                       | 724 (483 – 737)                     | 0.02         |

\* p value from Mann Whitney U test

**Table S2: Plasma biomarkers of lung injury and inflammation in unstimulated subjects and after LPS inhalation**

| Biomarker               | Unstimulated – Belfast Cohort           |                                     |              | Post-LPS – Belfast Cohort               |                                     |              |
|-------------------------|-----------------------------------------|-------------------------------------|--------------|-----------------------------------------|-------------------------------------|--------------|
|                         | Nonsmokers<br>(n = 21)<br>(Median, IQR) | Smokers<br>(n = 9)<br>(Median, IQR) | P-<br>value* | Nonsmokers<br>(n = 21)<br>(Median, IQR) | Smokers<br>(n = 9)<br>(Median, IQR) | P-<br>value* |
| MMP-8<br>(ng/mL)        | 1 (1 – 2)                               | 1 (1 – 2)                           | 0.61         | 6 (4 – 10)                              | 11 (9 – 22)                         | 0.006        |
| IL-1 $\beta$<br>(pg/mL) | 0 (0 – 0)                               | 0 (0 – 0)                           | 1.0          | 0 (0 – 0)                               | 0 (0 – 0)                           | 0.23         |
| SP-D<br>(ng/mL)         | 104 (66 – 124)                          | 108 (76 – 136)                      | 0.54         | 96 (69 – 128)                           | 130 (114 – 201)                     | 0.04         |
| IL-8<br>(pg/mL)         | 0 (0 – 0)                               | 0 (0 – 0)                           | 1.0          | 2 (1 – 2)                               | 2 (0 – 3)                           | 0.003        |

\* p value from Mann Whitney U test

**Table S3: Linear regression coefficients of smoking for bronchoalveolar lavage biomarkers of lung injury and inflammation after LPS inhalation (Belfast cohort)**

| <b>Biomarker</b>                         | <b>Unadjusted Coefficient</b> | <b>P value</b> | <b>Coefficient Adjusted for Statin</b> | <b>P value</b> |
|------------------------------------------|-------------------------------|----------------|----------------------------------------|----------------|
| Total Protein*<br>(log units)            | 0.23                          | 0.07           | 0.21                                   | 0.09           |
| IL-1 $\beta$<br>(pg/mL)                  | 63                            | < 0.001        | 61                                     | < 0.001        |
| Neutrophils<br>(x 10 <sup>5</sup> cells) | 8                             | 0.02           | 7                                      | 0.03           |
| Neutrophils<br>(%)                       | 19                            | 0.006          | 19                                     | 0.009          |
| SP-D*<br>(log units)                     | -0.49                         | 0.03           | -0.51                                  | 0.03           |
| VEGF*<br>(log units)                     | - 1.9                         | < 0.001        | -1.9                                   | <0.001         |
| sVEGFr-1<br>(pg/mL)                      | 80                            | <0.001         | 77                                     | <0.001         |

\* log transformed

**Table S4: Linear regression coefficients of interaction between smoking and LPS for bronchoalveolar lavage biomarkers of lung injury and inflammation**

| <b>Biomarker</b>                         | <b>Unadjusted Coefficient For Interaction Between Smoking and LPS</b> | <b>P value for interaction</b> | <b>Coefficient Adjusted for Statin + Age</b> | <b>P value for interaction, Adjusted for Statin + Age</b> |
|------------------------------------------|-----------------------------------------------------------------------|--------------------------------|----------------------------------------------|-----------------------------------------------------------|
| Total Protein*<br>(log units)            | 0.56                                                                  | 0.04                           | 0.54                                         | 0.047                                                     |
| IL-1 $\beta$<br>(pg/mL)                  | 62                                                                    | < 0.001                        | 58                                           | 0.001                                                     |
| Neutrophils<br>(x 10 <sup>5</sup> cells) | 5                                                                     | 0.15                           | 5                                            | 0.18                                                      |
| Neutrophils<br>(%)                       | 19                                                                    | 0.01                           | 18                                           | 0.02                                                      |
| SP-D*<br>(log units)                     | -0.41                                                                 | 0.13                           | -0.46                                        | 0.09                                                      |
| VEGF*<br>(log units)                     | - 1.1                                                                 | < 0.001                        | -1.1                                         | <0.001                                                    |
| sVEGFr-1<br>(pg/mL)                      | 77                                                                    | <0.001                         | 73                                           | <0.001                                                    |

\* log transformed

**Table S5: Linear regression coefficients of smoking for plasma biomarkers of lung injury and inflammation after LPS inhalation (Belfast cohort)**

| <b>Biomarker</b>     | <b>Unadjusted Coefficient</b> | <b>P value</b> | <b>Coefficient Adjusted for Statin</b> | <b>P value</b> |
|----------------------|-------------------------------|----------------|----------------------------------------|----------------|
| MMP-8 (ng/mL)        | 7431                          | 0.008          | 6480                                   | 0.01           |
| IL-1 $\beta$ (pg/mL) | 0                             | 0.27           | 0                                      | 0.30           |
| SP-D (ng/mL)         | 58                            | 0.049          | 59                                     | 0.05           |
| IL-8 (pg/mL)         | 1                             | 0.003          | 1                                      | 0.001          |

**Table S6: Linear regression coefficients of interaction between smoking and LPS for plasma biomarkers of lung injury and inflammation**

| <b>Biomarker</b>     | <b>Unadjusted Coefficient for Interaction between Smoking and LPS</b> | <b>P value for interaction</b> | <b>Coefficient Adjusted for Statin</b> | <b>P value for interaction, adjusted for Statin</b> |
|----------------------|-----------------------------------------------------------------------|--------------------------------|----------------------------------------|-----------------------------------------------------|
| MMP-8 (ng/mL)        | 6329                                                                  | 0.045                          | 6864                                   | 0.03                                                |
| IL-1 $\beta$ (pg/mL) | 0                                                                     | 0.26                           | 0                                      | 0.26                                                |
| SP-D (ng/mL)         | 36                                                                    | 0.31                           | 36                                     | 0.31                                                |
| IL-8 (pg/mL)         | 1                                                                     | 0.002                          | 1                                      | 0.002                                               |



**Table S7: Bronchoalveolar lavage biomarkers of lung injury and inflammation in 4 additional smoking Belfast subjects before and after LPS inhalation**

| <b>Biomarker</b>                   | <b>Pre-LPS<br/>(median, IQR)</b> | <b>Post-LPS<br/>(median, IQR)</b> |
|------------------------------------|----------------------------------|-----------------------------------|
| Total Protein ( $\mu\text{g/mL}$ ) | 37 (19 – 59)                     | 104 (42 – 163)                    |
| IL-1 $\beta$ (pg/mL)               | 0 (0 – 3)                        | 38 (27 – 63)                      |
| SP-D (ng/mL)                       | 260 (219 – 296)                  | 293 (225 – 351)                   |
| VEGF (pg/mL)                       | 72 (19 – 130)                    | 81 (13 – 156)                     |
| sVEGFr-1 (pg/mL)                   | 19 (15 – 25)                     | 28 (23 – 34)                      |
| IL-8 (ng/mL)                       | 0 (0 – 3)                        | 151 (96 – 178)                    |

**Figure S1:** BAL biomarkers in 4 additional Belfast smokers that underwent bronchoscopy both before and 6 hours after 50  $\mu$ g LPS inhalation. A) BAL IL-8, B) BAL IL-1 $\beta$ , C) BAL VEGF, D) BAL sVEGFr-1, E) BAL SP-D, F) BAL Total Protein. Each line connects individual data points from a single subject. — = median value.

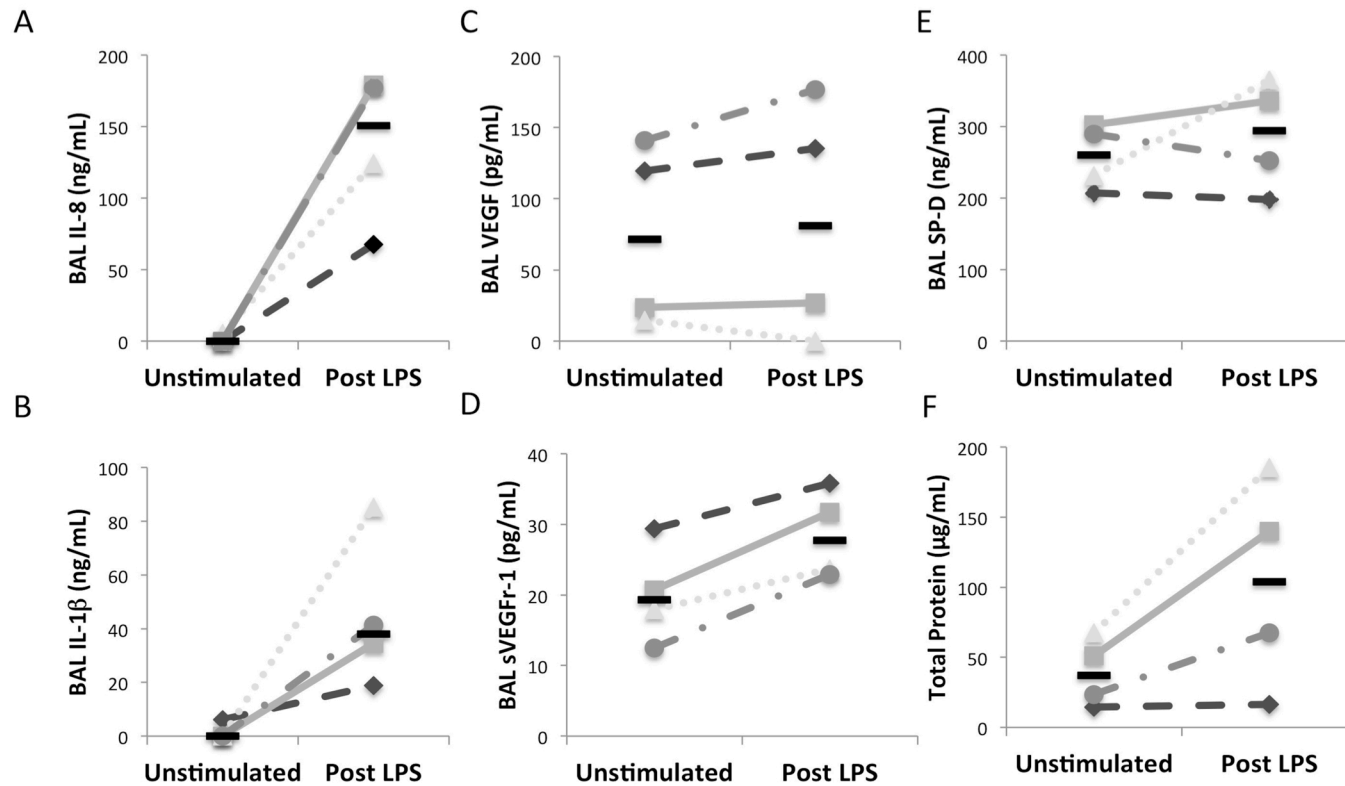

## References:

1. Burnham EL, Kovacs EJ, Davis CS. Pulmonary cytokine composition differs in the setting of alcohol use disorders and cigarette smoking. *American journal of physiology Lung cellular and molecular physiology* 2013;**304**(12):L873-82.
2. Shyamsundar M, McKeown ST, O'Kane CM, et al. Simvastatin decreases lipopolysaccharide-induced pulmonary inflammation in healthy volunteers. *American journal of respiratory and critical care medicine* 2009;**179**(12):1107-14.
3. Sohy C, Pons F, Casset A, et al. Low-dose endotoxin in allergic asthmatics: effect on bronchial and inflammatory response to cat allergen. *Clinical and experimental allergy : journal of the British Society for Allergy and Clinical Immunology* 2006;**36**(6):795-802.
